# Supplementary material for: Vac8 Controls Vacuolar Membrane Dynamics during Different Autophagy Pathways in Saccharomyces cerevisiae
Source: PubMed Central journal article supplement (PMC6678646; doi:10.3390/cells8070661), 2019-06-30
Supplement: cells-08-00661-s001.pdf [file cells-08-00661-s001.pdf]

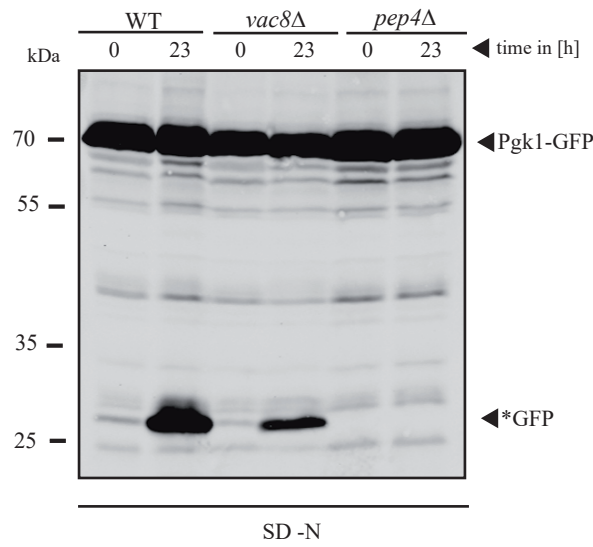

**Figure S1.** The degradation of the cytosolic protein Pgk1-GFP is slightly reduced under starvation conditions (SD-N) in *vac8Δ* cells.

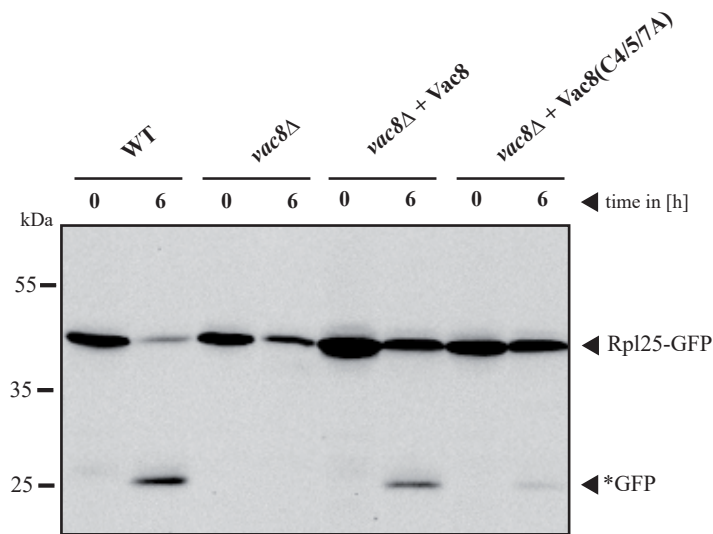

**Figure S2.** Palmitoylation of Vac8 is required for ribophagy. Ribosomes were marked with the Rpl25-GFP fusion protein. After induction of ribophagy, the appearance of free \*GFP was detectable in WT and complemented cells, while it was hardly detectable in cells with the palmitoylation-deficient Vac8(C4/5/7A).

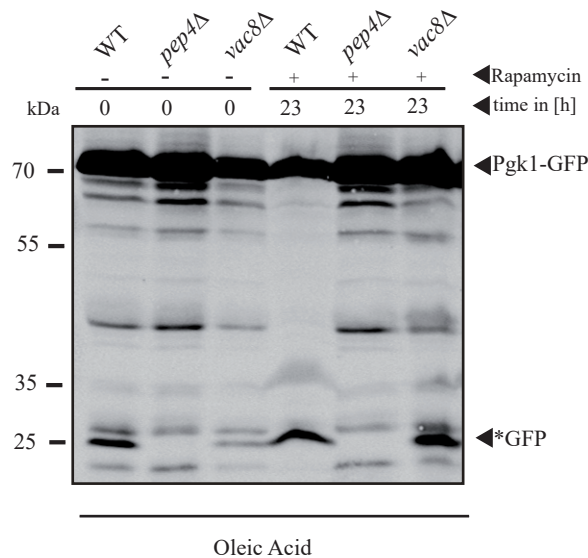

**Figure S3.** The impaired degradation of the cytosolic protein Pgk1-GFP in glucose-grown *vac8Δ* cells can be complemented by a shift to oleic acid-containing medium. This is shown by the WT-like level of free \*GFP in *vac8Δ* cells after 23h.
